# Supplementary material for: Magnetic Resonance Imaging as a Prognostic Disability Marker in Clinically Isolated Syndrome and Multiple Sclerosis: A Systematic Review and Meta-Analysis
Source: MDPI journal article supplement (doi:10.3390/diagnostics12020270), 2022-01-21
Supplement: s1 [file s1]

## Supplementary Figure S1. Search strategy and key works (assessed by librarians)

### Web of science

("multiple sclerosis" OR "MS") AND ("Magnetic resonance imaging" OR "MRI") AND  
(white matter lesion OR lesions) AND (long\*) AND (Disability) AND (T2 or FLAIR)

### PubMed

("multiple sclerosis" OR "MS") AND ("Magnetic resonance imaging" OR "MRI") AND  
(white matter lesion OR lesions) AND (long\*) AND (Disability) AND (T2 or FLAIR)

### Embase:

("multiple sclerosis"[MeSH Terms] OR "multiple sclerosis"[All Fields] OR "MS"[All  
Fields]) AND ("magnetic resonance imaging"[MeSH Terms] OR "magnetic"[All  
Fields] OR "imaging"[All Fields]) AND ("lesion" [All Fields] OR "lesions"[All  
Fields])  
AND (white matter [All Fields]) AND ("disability"[All Fields]) AND (long\* [All Fields])  
AND ("T2" [All Fields] OR "FLAIR" [All Fields])

Below is a sample search I ran in Ovid MEDLINE. Notice that both MeSH  
terms *and* keywords (the lines ending in **.mp.**) have been used. The MeSH terms have  
been ‘exploded’ (**exp** Magnetic Resonance Imaging/) and included all their sub-  
headings. The number of results I got was **102**

|    |                                                                                                                                                                                                                                                                                                                                      |         |
|----|--------------------------------------------------------------------------------------------------------------------------------------------------------------------------------------------------------------------------------------------------------------------------------------------------------------------------------------|---------|
| 1  | exp Magnetic Resonance Imaging/                                                                                                                                                                                                                                                                                                      | 470430  |
| 2  | (MRI or "magnetic resonance imaging").mp. [mp=title, abstract, original title, name of substance word, subject heading word, floating sub-heading word, keyword heading word, organism supplementary concept word, protocol supplementary concept word, rare disease supplementary concept word, unique identifier, synonyms]        | 603156  |
| 3  | (WML or "white matter lesion").mp. [mp=title, abstract, original title, name of substance word, subject heading word, floating sub-heading word, keyword heading word, organism supplementary concept word, protocol supplementary concept word, rare disease supplementary concept word, unique identifier, synonyms]               | 5290    |
| 4  | (count* or number*).mp. [mp=title, abstract, original title, name of substance word, subject heading word, floating sub-heading word, keyword heading word, organism supplementary concept word, protocol supplementary concept word, rare disease supplementary concept word, unique identifier, synonyms]                          | 3384137 |
| 5  | volume*.mp. [mp=title, abstract, original title, name of substance word, subject heading word, floating sub-heading word, keyword heading word, organism supplementary concept word, protocol supplementary concept word, rare disease supplementary concept word, unique identifier, synonyms]                                      | 771624  |
| 6  | exp Multiple Sclerosis/                                                                                                                                                                                                                                                                                                              | 60809   |
| 7  | (MS or "multiple sclerosis").mp. [mp=title, abstract, original title, name of substance word, subject heading word, floating sub-heading word, keyword heading word, organism supplementary concept word, protocol supplementary concept word, rare disease supplementary concept word, unique identifier, synonyms]                 | 400696  |
| 8  | exp Disability Evaluation/                                                                                                                                                                                                                                                                                                           | 53879   |
| 9  | (EDSS or "Expanded Disability Status Scale").mp. [mp=title, abstract, original title, name of substance word, subject heading word, floating sub-heading word, keyword heading word, organism supplementary concept word, protocol supplementary concept word, rare disease supplementary concept word, unique identifier, synonyms] | 6415    |
| 10 | (disabilit* or disabled).mp. [mp=title, abstract, original title, name of substance word, subject heading word, floating sub-heading word, keyword heading word, organism supplementary concept word, protocol supplementary concept word, rare disease supplementary concept word, unique identifier, synonyms]                     | 334935  |
| 11 | 1 or 2                                                                                                                                                                                                                                                                                                                               | 623201  |
| 12 | 4 or 5                                                                                                                                                                                                                                                                                                                               | 4032476 |
| 13 | 6 or 7                                                                                                                                                                                                                                                                                                                               | 400696  |
| 14 | 8 or 9 or 10                                                                                                                                                                                                                                                                                                                         | 339822  |
| 15 | 3 and 11 and 12 and 13 and 14                                                                                                                                                                                                                                                                                                        | 102     |

**Supplementary Table S1. MRI data, raters, and lesion segmentation.**

| Study               | T2 Lesion Sequence | T2/PD Slice Thickness | MRI -Tesla       | Blinded to Clinical Details | No. of raters   | Lesion Segmentation | Software                               |
|---------------------|--------------------|-----------------------|------------------|-----------------------------|-----------------|---------------------|----------------------------------------|
| Tintore 2020        | T2, PD, FLAIR      | 3-5mm                 | 1.5T or 3T       | ⊖                           | ⊖               | ⊖                   | ⊖                                      |
| Chung 2020          | T2, PD             | 5-10mm                | 1.5T or 3T       | ⊖                           | 3               | ⊖                   | ⊖                                      |
| Brownlee,2019       | T2, PD             | 3mm                   | 1.5T             | Yes                         | 1               | Semi-automated      | JIM6, Xinapse systems, Aldwinckle, UK  |
| Tintore 2015*       | T2, PD, Flair      | 3-5 mm                | 1.5T or 3T       | ⊖                           | ⊖               | ⊖                   | ⊖                                      |
| Jacobsen 2014*      | T2, PD             | 5mm                   | 1.5T             | ⊖                           | ⊖               | Semi-automated      | ⊖                                      |
| Kearney 2014        | T2                 | 1-3mm                 | 1.5T or 3T       | ⊖                           | 2               | Semi-automated      | JIM6, Xinapse systems, Aldwinckle, UK  |
| Giorgio 2014        | T2, PD             | 3mm                   | 1.5T             | Yes                         | 1               | Semi-automated      | Jim 5.0, Xinapse System, Leicester, UK |
| Popescu 2013        | T2                 | 3-5mm                 | 1T or 1.5T       | Yes                         | 1               | Semi-automated      | Jim 5.0, Xinapse System, Leicester, UK |
| Rovaris 2011        | T2                 | 3-5mm                 | 1T or 1.5T       | Yes                         | 1               | Semi-automated      | Jim, Xinapse System, Leicester, UK     |
| Renard 2010         | T2, PD, Flair      | 3mm                   | 1.5T             | Yes                         | 2               | Semi-automated      | ⊖                                      |
| Fisniku 2008*       | T2                 | 5-10mm                | 0.5T             | Yes                         | 1               | Semi-automated      | DispImage                              |
| Chard 2003          | T2                 | 5-10mm                | 1.5T             | Yes                         | 2               | Semi-automated      | DispImage                              |
| Brex. 2002          | T2                 | 5-10mm                | 0.5T             | ⊖                           | ⊖               | Semi-automated      | DispImage                              |
| Sailer 1999         | T2                 | 5-10mm                | 0.5              | ⊖                           | 1               | Semi-automated      | DispImage                              |
| O’Riordan 1998      | ⊖                  | 5-10mm                | 0.5              | Yes                         | 2               | Semi-automated      | DispImage                              |
| <b>Reported (%)</b> | <b>14 (93%)</b>    | <b>15 (100%)</b>      | <b>15 (100%)</b> | <b>8 (53%)</b>              | <b>11 (73%)</b> | <b>12 (80%)</b>     | <b>10 (66%)</b>                        |

⊖: not reported, T2: T2 weighted images, PD: proton density, \*studies included in the Meta-analysis, No: Number.

**Supplementary Figure S2. Key elements for forest plot interpretation.**

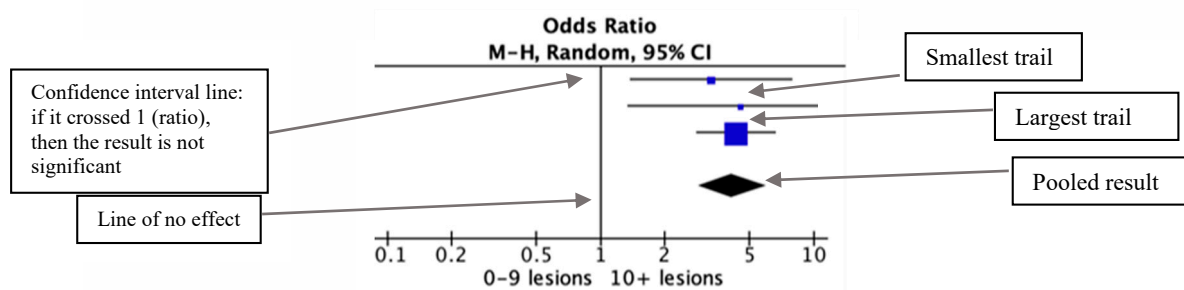

**Legend:**

■ This square represents the individual studies effect. The size varies to reflect the weight a specific study has in the overall analysis (larger “symbol” has more weight).

—■ The black line represents the CIs of the study; the smaller “symbol” which has less weight generally has larger CIs than the larger “symbol”.

◆ The diamond represents the overall or summary effect. The outer edges of the diamond represent the CIs.
